# Supplementary material for: Electrolytes for reversible zinc electrodeposition for dynamic windows
Source: Royal Society of Chemistry journal article supplement (doi:10.1039/d1tc00857a), 2021-01-01
Supplement: d1tc00857a1.pdf [file d1tc00857a1.pdf]

# Supplementary Information for:

## **Electrolytes for Reversible Zinc Electrodeposition for Dynamic Windows**

Desmond C. Madu, Shakirul M. Islam, Hanqing Pan, and Christopher J. Barile\*

Department of Chemistry, University of Nevada, Reno, NV 89557

\*E-mail: [cbarile@unr.edu](mailto:cbarile@unr.edu)

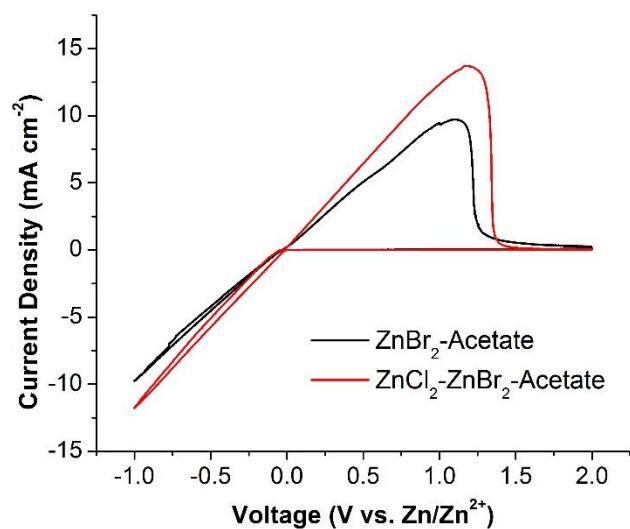

**Figure S1:** Cyclic voltammogram at a scan rate of 25 mV s<sup>-1</sup> of Pt-modified ITO working electrodes in electrolytes containing 0.5 M sodium acetate and 0.5 M ZnBr<sub>2</sub> (black line) or 0.25 M ZnCl<sub>2</sub> and 0.25 M ZnBr<sub>2</sub>.

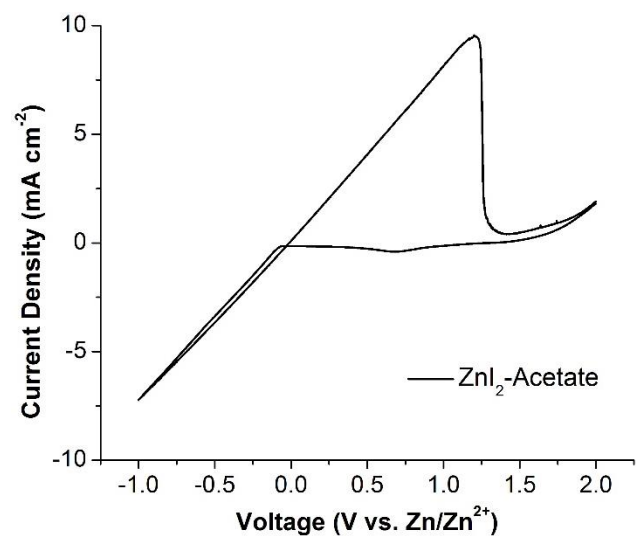

**Figure S2:** Cyclic voltammogram at a scan rate of 25 mV s<sup>-1</sup> of a Pt-modified ITO working electrode in an electrolyte containing 0.5 M ZnI<sub>2</sub> and 0.5 M sodium acetate.

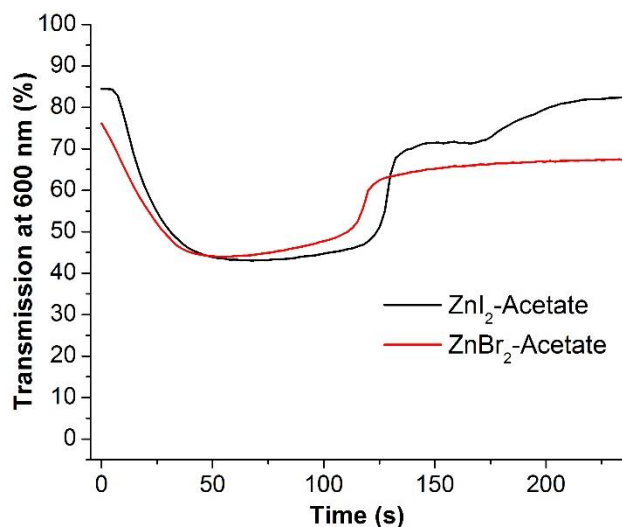

**Figure S3:** Transmission at 600 nm of the working electrode during the second cycle of CVs in an electrolyte containing 0.5 M sodium acetate and 0.5 M  $\text{ZnI}_2$  (black line) or  $\text{ZnBr}_2$  (red line). The corresponding CVs are displayed in Figure S1 and S2.

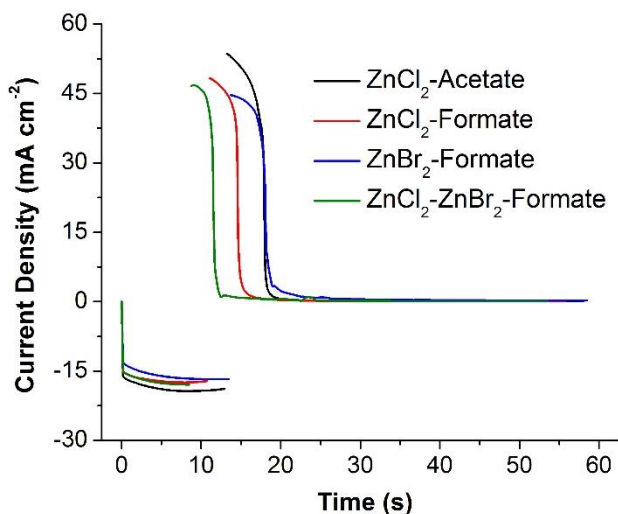

**Figure S4:** Chronoamperometry during Zn electrodeposition and stripping in electrolytes containing 0.5 M sodium acetate and 0.5 M  $\text{ZnCl}_2$  (black line), or 0.5 M sodium formate and 0.5 M  $\text{ZnCl}_2$  (red line), 0.5 M  $\text{ZnBr}_2$  (blue line), or 0.25 M  $\text{ZnCl}_2$  and 0.25 M  $\text{ZnBr}_2$  (green line). To elicit Zn electrodeposition, chronoamperometry was conducted at -1.0 V until the transmission at 600 nm reached 1%. Next, Zn stripping was conducted at +2.5 V.

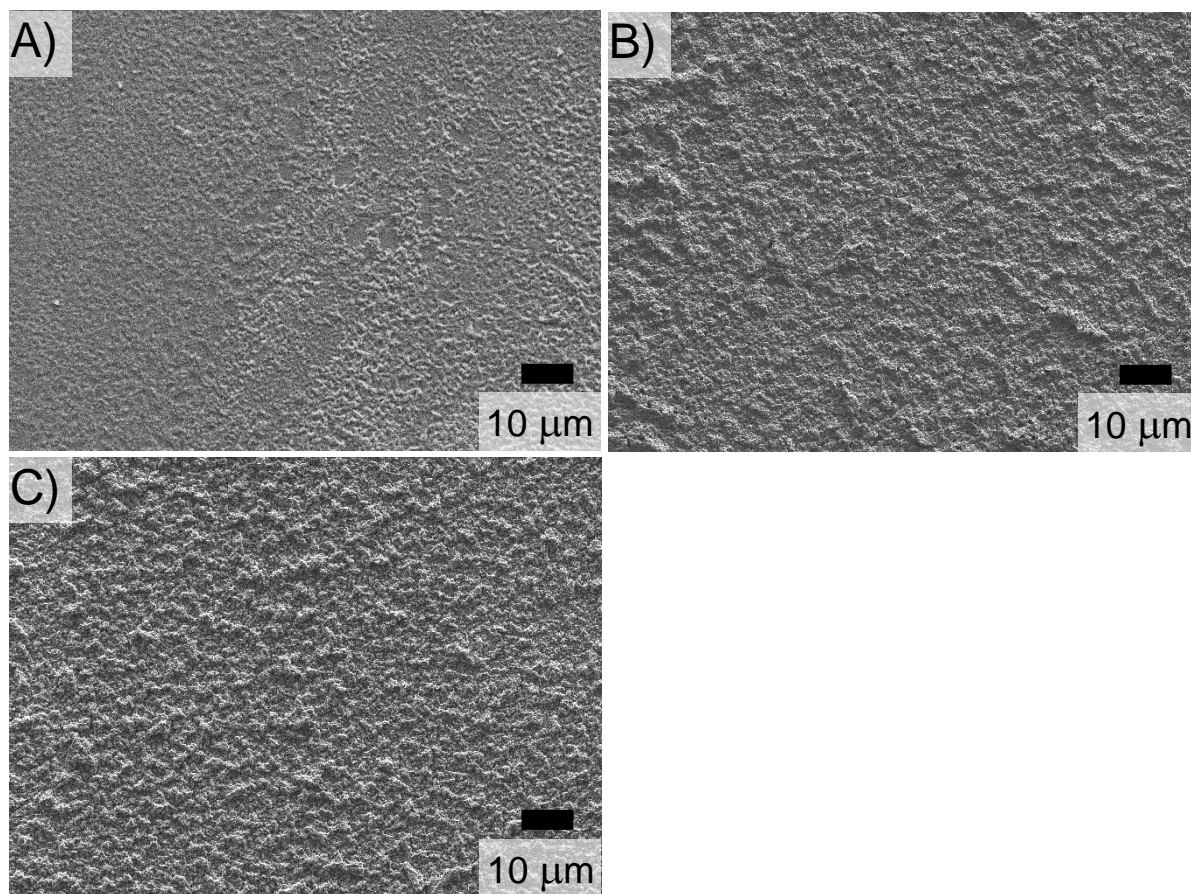

**Figure S5:** Scanning electron microscopy images of Zn electrodeposits obtained after a linear sweep voltammogram from 0 V to -0.25 V (A), -0.5 V (B), and -0.75 V (C) at  $5 \text{ mV s}^{-1}$  in an electrolyte containing 0.5 M sodium formate and 0.25 M  $\text{ZnCl}_2$  and 0.25 M  $\text{ZnBr}_2$ . The transmissions at 600 nm of the electrodes were 38%, 14%, and 4% for panels A, B, and C, respectively.

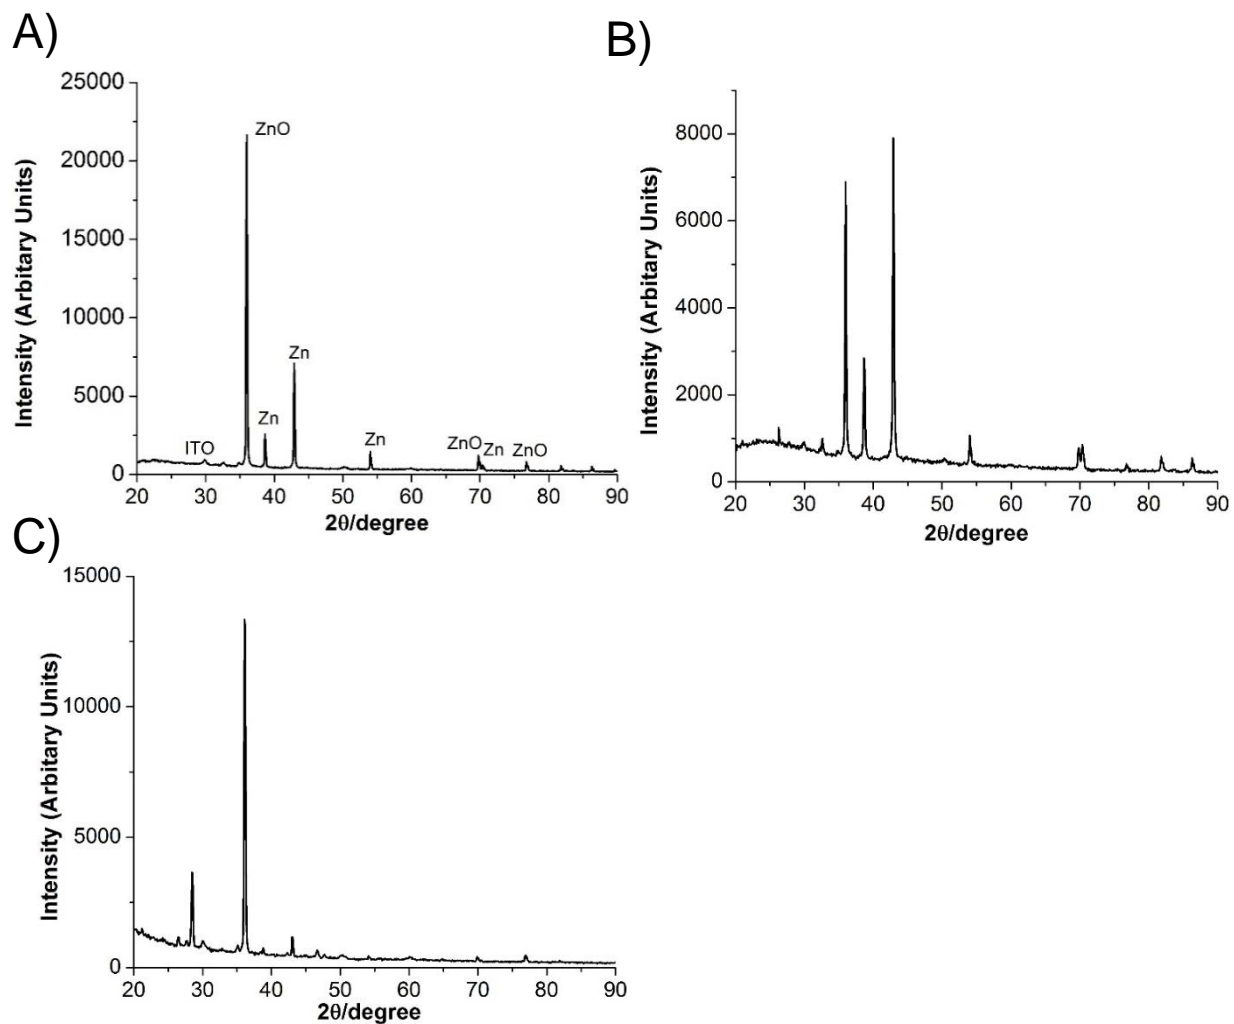

**Figure S6:** Representative X-ray diffraction spectra of Zn electrodeposits obtained after a linear sweep voltammogram from 0 V to -1 V at  $5 \text{ mV s}^{-1}$  in an electrolyte containing 0.5 M sodium formate and 0.5 M  $\text{ZnCl}_2$  (A), 0.5 M  $\text{ZnBr}_2$  (B), or 0.25 M  $\text{ZnCl}_2$  and 0.25 M  $\text{ZnBr}_2$  (C).

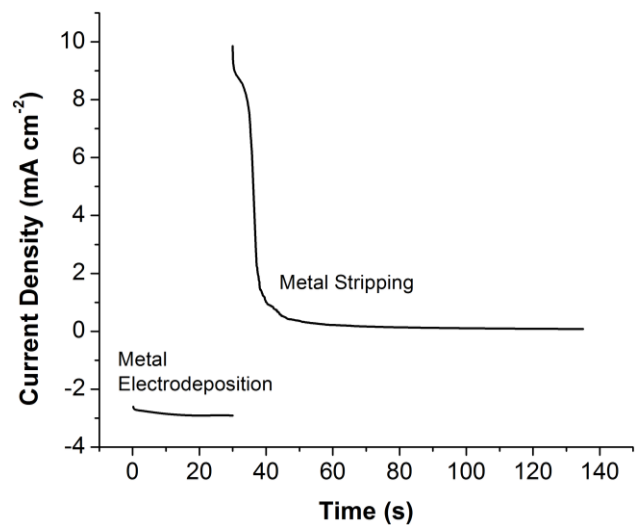

**Figure S7:** Chronoamperometry during switching of 25 cm<sup>2</sup> dynamic window based on reversible Zn electrodeposition. Metal electrodeposition on the working electrode was elicited by applying -0.8 V for 30 s before +2.3 V was applied to induce metal stripping.

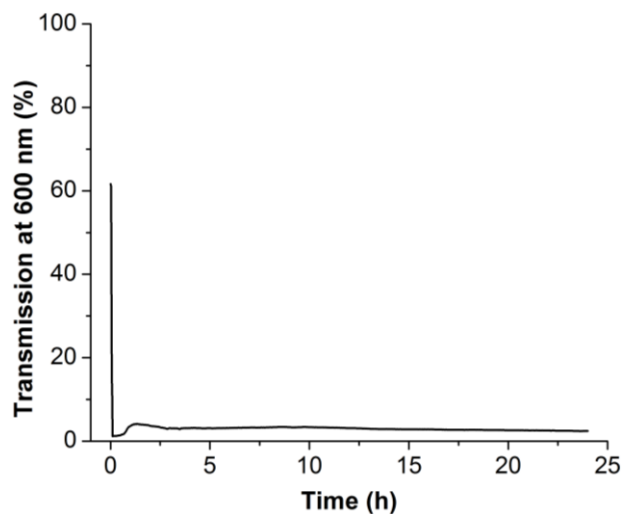

**Figure S8:** Transmission at 600 nm of a 25 cm<sup>2</sup> dynamic window based on reversible Zn electrodeposition. Initially, the device was switched to 1% transmission. For the remaining 24 hours, no voltage was applied to the device.
